# Supplementary material for: Representation of women in ophthalmology journal editorial boards
Source: HighWire-hosted journal article supplement (doi:10.1136/bmjophth-2022-001127), 2022-10-01
Supplement: bmjophth-2022-001127supp001_data_supplement.pdf [file bmjophth-2022-001127supp001_data_supplement.pdf]

**eTable 1.** Summary characteristics of the journals included in the study.

|    | Journal Title                                                              | Country Income Category <sup>a</sup> | Country Region <sup>b</sup> | Subspecialty Category <sup>c</sup>     | IF (JCR quartile <sup>d</sup> ) | IF Source | SJR Indicator <sup>e</sup> |
|----|----------------------------------------------------------------------------|--------------------------------------|-----------------------------|----------------------------------------|---------------------------------|-----------|----------------------------|
| 1  | Acta Estrabologica                                                         | High income                          | Europe & Central Asia       | Strabismus and paediatrics             | N/A                             | N/A       | N/A                        |
| 2  | Acta Ophthalmologica                                                       | High income                          | Europe & Central Asia       | General                                | 3.76 (Q1)                       | JCR       | 1.53                       |
| 3  | Advanced Studies in Ophthalmology                                          | High income                          | North America               | General                                | N/A                             | N/A       | N/A                        |
| 4  | Advances in Ophthalmology & Visual System                                  | High income                          | North America               | General                                | N/A                             | N/A       | N/A                        |
| 5  | Advances in Ophthalmology and Optometry                                    | High income                          | North America               | General                                | 0.17                            | AA        | 0.15                       |
| 6  | African Vision and Eye Health                                              | Upper middle income                  | Sub-Saharan Africa          | General                                | 0.37                            | AA        | 0.19                       |
| 7  | Al-Basar International Journal of Ophthalmology                            | High income                          | Middle East & North Africa  | General                                | N/A                             | N/A       | N/A                        |
| 8  | Journal of American Association for Pediatric Ophthalmology and Strabismus | High income                          | North America               | Strabismus and paediatrics             | 1.22 (Q4)                       | JCR       | 0.67                       |
| 9  | American Journal of Ophthalmic Clinical Trials                             | High income                          | North America               | General                                | N/A                             | N/A       | N/A                        |
| 10 | American Journal of Ophthalmology                                          | High income                          | North America               | General                                | 5.26 (Q1)                       | JCR       | 2.70                       |
| 11 | American Journal of Ophthalmology Case Reports                             | High income                          | North America               | General                                | 0.86                            | AA        | 0.43                       |
| 12 | Annals of Eye Science                                                      | High income                          | East Asia & Pacific         | General                                | N/A                             | N/A       | N/A                        |
| 13 | Arquivos Brasileiros de Oftalmologia                                       | Upper middle income                  | Latin America & Caribbean   | General                                | 0.87 (Q4)                       | JCR       | 0.60                       |
| 14 | Asia-Pacific Journal of Ophthalmology                                      | High income                          | East Asia & Pacific         | General                                | 2.83 (Q2)                       | JCR       | 1.16                       |
| 15 | Asian Journal of Ophthalmology                                             | High income                          | Europe & Central Asia       | General                                | 0.02                            | AA        | 0.11                       |
| 16 | Beyoglu Eye Journal                                                        | Upper middle income                  | Europe & Central Asia       | General                                | N/A                             | N/A       | N/A                        |
| 17 | Bina Journal of Ophthalmology                                              | Lower middle income                  | Middle East & North Africa  | General                                | N/A                             | N/A       | N/A                        |
| 18 | BMC Ophthalmology                                                          | High income                          | Europe & Central Asia       | General                                | 2.21 (Q3)                       | JCR       | 0.88                       |
| 19 | BMJ Open Ophthalmology                                                     | High income                          | Europe & Central Asia       | General                                | 2.15                            | AA        | 0.98                       |
| 20 | British Journal of Ophthalmology                                           | High income                          | Europe & Central Asia       | General                                | 4.64 (Q1)                       | JCR       | 2.02                       |
| 21 | British Undergraduate Journal of Ophthalmology                             | High income                          | Europe & Central Asia       | General                                | N/A                             | N/A       | N/A                        |
| 22 | Canadian Journal of Ophthalmology                                          | High income                          | North America               | General                                | 1.88 (Q4)                       | JCR       | 0.61                       |
| 23 | Case Reports in Ophthalmology                                              | High income                          | Europe & Central Asia       | General                                | 0.56                            | AA        | 0.30                       |
| 24 | Ceska a Slovenska Oftalmologie                                             | High income                          | Europe & Central Asia       | General                                | 0.11                            | AA        | 0.18                       |
| 25 | Clinical and Experimental Ocular Trauma and Infection                      | Upper middle income                  | Europe & Central Asia       | Ocular immunology/inflammation/uveitis | N/A                             | N/A       | N/A                        |
| 26 | Clinical and Experimental Ophthalmology                                    | High income                          | East Asia & Pacific         | General                                | 4.21 (Q1)                       | JCR       | 1.30                       |
| 27 | Clinical Ophthalmology                                                     | High income                          | Europe & Central Asia       | General                                | 2.08                            | AA        | 1.03                       |
| 28 | Community Eye Health                                                       | High income                          | Europe & Central Asia       | General                                | 0.54                            | AA        | 0.12                       |
| 29 | Cornea                                                                     | High income                          | North America               | Cornea                                 | 2.65 (Q3)                       | JCR       | 1.27                       |
| 30 | Current Eye Research                                                       | High income                          | Europe & Central Asia       | General                                | 2.42 (Q3)                       | JCR       | 0.84                       |
| 31 | Current Ophthalmology Reports                                              | High income                          | North America               | General                                | 0.67                            | AA        | 0.35                       |
| 32 | Current Opinion in Ophthalmology                                           | High income                          | Europe & Central Asia       | General                                | 3.76 (Q1)                       | JCR       | 1.37                       |
| 33 | Current Trends in Ophthalmology                                            | High income                          | North America               | General                                | N/A                             | N/A       | N/A                        |
| 34 | Delta Journal of Ophthalmology                                             | Lower middle income                  | Middle East & North Africa  | General                                | N/A                             | N/A       | N/A                        |
| 35 | Der Ophthalmologe                                                          | High income                          | Europe & Central Asia       | General                                | 0.74                            | AA        | N/A                        |
| 36 | Digital Journal of Ophthalmology                                           | High income                          | North America               | General                                | 0.35                            | AA        | N/A                        |
| 37 | Documenta Ophthalmologica                                                  | High income                          | Europe & Central Asia       | General                                | 2.38 (Q3)                       | JCR       | 0.78                       |
| 38 | Journal of the Egyptian Ophthalmological Society                           | Lower middle income                  | Middle East & North Africa  | General                                | N/A                             | N/A       | N/A                        |
| 39 | Egyptian Retina Journal                                                    | Lower middle income                  | Middle East & North Africa  | Retina and vitreoretinal surgery       | N/A                             | N/A       | N/A                        |
| 40 | European Journal of Ophthalmology                                          | High income                          | Europe & Central Asia       | General                                | 2.6 (Q3)                        | JCR       | 0.79                       |
| 41 | European Medical Journal Ophthalmology                                     | High income                          | Europe & Central Asia       | General                                | 1.64                            | AA        | N/A                        |

|    |                                                                   |                     |                            |                                                    |           |                 |      |
|----|-------------------------------------------------------------------|---------------------|----------------------------|----------------------------------------------------|-----------|-----------------|------|
| 42 | Experimental Eye Research                                         | High income         | Europe & Central Asia      | Basic science                                      | 3.47 (Q2) | JCR             | 1.22 |
| 43 | Expert Review of Ophthalmology                                    | High income         | Europe & Central Asia      | General                                            | 0.74      | AA              | 0.46 |
| 44 | Eye                                                               | High income         | Europe & Central Asia      | General                                            | 3.78 (Q1) | JCR             | 1.45 |
| 45 | Eye and Brain                                                     | High income         | Europe & Central Asia      | Neuro-ophthalmology                                | 3.83      | AA              | 1.02 |
| 46 | Eye and Contact Lens                                              | High income         | North America              | Cataract and refractive surgery;<br>Cornea         | 2.02 (Q3) | JCR             | 0.78 |
| 47 | Eye and Glaucoma Research                                         | High income         | Europe & Central Asia      | Glaucoma                                           | N/A       | N/A             | N/A  |
| 48 | Eye and Vision                                                    | High income         | Europe & Central Asia      | General                                            | 3.26 (Q2) | JCR             | N/A  |
| 49 | Eye Reports                                                       | High income         | North America              | General                                            | N/A       | N/A             | N/A  |
| 50 | Glaukoma                                                          | Upper middle income | Europe & Central Asia      | Glaucoma                                           | N/A       | N/A             | N/A  |
| 51 | Glokom-Katarakt                                                   | Upper middle income | Europe & Central Asia      | Glaucoma; Cataract and refractive surgery          | N/A       | N/A             | N/A  |
| 52 | Graefe's Archive for Clinical and Experimental Ophthalmology      | High income         | Europe & Central Asia      | General                                            | 3.12 (Q2) | JCR             | 1.20 |
| 53 | Historia Ophthalmologica Internatonalis                           | Upper middle income | Latin America & Caribbean  | General                                            | N/A       | N/A             | N/A  |
| 54 | IJRetina                                                          | Lower middle income | East Asia & Pacific        | Retina and vitreoretinal surgery                   | N/A       | N/A             | N/A  |
| 55 | Images en Ophtalmologie                                           | High income         | Europe & Central Asia      | General                                            | N/A       | N/A             | N/A  |
| 56 | Indian Journal of Ophthalmology                                   | Lower middle income | South Asia                 | General                                            | 1.85 (Q4) | JCR             | 0.54 |
| 57 | International Journal of Eye Banking                              | High income         | North America              | Cornea                                             | N/A       | N/A             | N/A  |
| 58 | International Journal of Keratoconus and Ectatic Corneal Diseases | Lower middle income | South Asia                 | Cornea                                             | N/A       | N/A             | N/A  |
| 59 | International Journal of Ophthalmic Pathology                     | High income         | Europe & Central Asia      | General                                            | 1.35      | Journal website | N/A  |
| 60 | International Journal of Ophthalmic Research                      | High income         | East Asia & Pacific        | General                                            | N/A       | N/A             | N/A  |
| 61 | International Journal of Ophthalmology                            | Upper middle income | East Asia & Pacific        | General                                            | 1.78 (Q4) | JCR             | 0.63 |
| 62 | International Journal of Ophthalmology & Eye Science              | High income         | North America              | General                                            | N/A       | N/A             | N/A  |
| 63 | International Journal of Ophthalmology and Clinical Research      | High income         | North America              | General                                            | N/A       | N/A             | N/A  |
| 64 | International Journal of Retina and Vitreous                      | High income         | Europe & Central Asia      | Retina and vitreoretinal surgery                   | 2.15      | AA              | 1.62 |
| 65 | International Ophthalmology                                       | High income         | Europe & Central Asia      | General                                            | 2.03 (Q3) | JCR             | 0.72 |
| 66 | International Ophthalmology Clinics                               | High income         | North America              | General                                            | 0.47 (Q4) | JCR             | 0.43 |
| 67 | Investigative Ophthalmology & Visual Science                      | High income         | North America              | General                                            | 4.8 (Q1)  | JCR             | 1.94 |
| 68 | Jacobs Journal of Ophthalmology                                   | High income         | North America              | General                                            | N/A       | N/A             | N/A  |
| 69 | JAMA Ophthalmology                                                | High income         | North America              | General                                            | 7.39 (Q1) | JCR             | 2.20 |
| 70 | Japanese Journal of Ophthalmology                                 | High income         | East Asia & Pacific        | General                                            | 2.45 (Q3) | JCR             | 0.93 |
| 71 | JCRS Online Case Reports                                          | High income         | North America              | Cataract and refractive surgery                    | 0.20      | AA              | 0.14 |
| 72 | Journal for Modeling in Ophthalmology                             | High income         | Europe & Central Asia      | General                                            | N/A       | N/A             | N/A  |
| 73 | Journal Francais d'Ophtalmologie                                  | High income         | Europe & Central Asia      | General                                            | 0.82 (Q4) | JCR             | 0.25 |
| 74 | Journal of Binocular Vision and Ocular Motility                   | High income         | Europe & Central Asia      | Strabismus and paediatrics;<br>Neuro-ophthalmology | 0.39      | AA              | 0.24 |
| 75 | Journal of Cataract & Refractive Surgery                          | High income         | North America              | Cataract and refractive surgery                    | 3.35 (Q2) | JCR             | 1.68 |
| 76 | Journal of Clinical & Experimental Ophtalmology                   | High income         | North America              | General                                            | 1.42      | Journal website | N/A  |
| 77 | Journal of Clinical Ophthalmology and Research                    | Lower middle income | South Asia                 | General                                            | N/A       | N/A             | N/A  |
| 78 | Journal of Clinical Research and Ophthalmology                    | Lower middle income | South Asia                 | General                                            | N/A       | N/A             | N/A  |
| 79 | Journal of Current Glaucoma Practice                              | Lower middle income | South Asia                 | Glaucoma                                           | 1.64      | AA              | 0.59 |
| 80 | Journal of Current Ophthalmology                                  | Lower middle income | Middle East & North Africa | General                                            | 1.96      | AA              | 0.73 |

|     |                                                  |                     |                            |                                        |           |                 |      |
|-----|--------------------------------------------------|---------------------|----------------------------|----------------------------------------|-----------|-----------------|------|
| 81  | Journal of Dry Eye and Ocular Surface Disease    | High income         | North America              | Cornea                                 | N/A       | N/A             | N/A  |
| 82  | Journal of EuCornea                              | High income         | North America              | Cornea                                 | N/A       | N/A             | N/A  |
| 83  | Journal of Eye and Ophthalmology                 | Lower middle income | South Asia                 | General                                | N/A       | N/A             | N/A  |
| 84  | Journal of Eye Diseases and Disorders            | High income         | Europe & Central Asia      | General                                | N/A       | N/A             | N/A  |
| 85  | Journal of Glaucoma                              | High income         | North America              | Glaucoma                               | 2.5 (Q3)  | JCR             | 1.11 |
| 86  | Journal of Neuro-Ophthalmology                   | High income         | North America              | Neuro-ophthalmology                    | 3.04 (Q2) | JCR             | 0.59 |
| 87  | Journal of Ocular Biology                        | High income         | North America              | General                                | N/A       | N/A             | N/A  |
| 88  | Journal of Ocular Diseases and Therapeutics      | Lower middle income | South Asia                 | General                                | N/A       | N/A             | N/A  |
| 89  | Journal of Ocular Pharmacology and Therapeutics  | High income         | North America              | General                                | 2.67 (Q2) | JCR             | 0.73 |
| 90  | Journal of Ophthalmic & Vision Research          | High income         | Middle East & North Africa | General                                | 1.36      | AA              | 0.56 |
| 91  | Journal of Ophthalmic Inflammation and Infection | High income         | Europe & Central Asia      | Ocular immunology/inflammation/uveitis | 1.39      | AA              | 0.82 |
| 92  | Journal of Ophthalmic Medical Technology         | High income         | North America              | General                                | N/A       | N/A             | N/A  |
| 93  | Journal of Ophthalmic Science                    | High income         | North America              | General                                | 1.23      | Journal website | N/A  |
| 94  | Journal of Ophthalmic Studies                    | High income         | North America              | General                                | N/A       | N/A             | N/A  |
| 95  | Journal of Ophthalmology                         | High income         | North America              | General                                | 1.91 (Q3) | JCR             | 0.82 |
| 96  | Journal of Ophthalmology and Related Sciences    | Lower middle income | Middle East & North Africa | General                                | N/A       | N/A             | N/A  |
| 97  | Journal of Ophthalmology and Research            | High income         | North America              | General                                | 1.20      | Journal website | N/A  |
| 98  | Journal of Pediatric Ophthalmology & Strabismus  | High income         | North America              | Strabismus and paediatrics             | 1.4 (Q4)  | JCR             | 0.42 |
| 99  | Journal of Refractive Surgery                    | High income         | North America              | Cataract and refractive surgery        | 3.57 (Q1) | JCR             | 1.44 |
| 100 | Journal of Refractive Surgery Case Reports       | High income         | North America              | Cataract and refractive surgery        | 0.20      | AA              | N/A  |
| 101 | Journal of Vision                                | High income         | North America              | Basic science                          | 2.15 (Q3) | JCR             | 1.13 |
| 102 | Journal of Vitreoretinal Diseases                | High income         | North America              | Retina and vitreoretinal surgery       | N/A       | N/A             | N/A  |
| 103 | Kerala Journal of Ophthalmology                  | Lower middle income | South Asia                 | General                                | N/A       | N/A             | N/A  |
| 104 | Klinika Oczna                                    | High income         | Europe & Central Asia      | General                                | 0.06      | AA              | 0.12 |
| 105 | Klinische Monatsblaetter fuer Augenheilkunde     | High income         | Europe & Central Asia      | General                                | 0.7 (Q4)  | JCR             | N/A  |
| 106 | Korean Journal of Ophthalmology                  | High income         | East Asia & Pacific        | General                                | 1.36      | AA              | 0.36 |
| 107 | Middle East African Journal of Ophthalmology     | Lower middle income | South Asia                 | General                                | 1.01      | AA              | 0.36 |
| 108 | Minerva Oftalmologica                            | High income         | Europe & Central Asia      | General                                | N/A       | N/A             | N/A  |
| 109 | Nepalese Journal of Ophthalmology                | Lower middle income | South Asia                 | General                                | N/A       | N/A             | N/A  |
| 110 | Neuro-Ophthalmology                              | High income         | Europe & Central Asia      | Neuro-ophthalmology                    | 0.90      | AA              | 0.31 |
| 111 | Neuro-Ophthalmology & Visual Neuroscience        | High income         | North America              | Neuro-ophthalmology                    | N/A       | N/A             | N/A  |
| 112 | New Frontiers in Ophthalmology                   | High income         | Europe & Central Asia      | General                                | 2.09      | Journal website | N/A  |
| 113 | Nigerian Journal of Ophthalmology                | Lower middle income | Sub-Saharan Africa         | General                                | N/A       | N/A             | N/A  |
| 114 | Ocular Immunology and Inflammation               | High income         | Europe & Central Asia      | Ocular immunology/inflammation/uveitis | 3.07 (Q2) | JCR             | 0.78 |
| 115 | Ocular Oncology and Pathology                    | High income         | Europe & Central Asia      | Ocular oncology; Ocular histopathology | 1.07      | AA              | N/A  |
| 116 | Oftal'mokhirurgiya                               | Upper middle income | Europe & Central Asia      | General                                | N/A       | N/A             | N/A  |
| 117 | Oftal'mologicheskie Vedomosti                    | Upper middle income | Europe & Central Asia      | General                                | N/A       | N/A             | N/A  |
| 118 | Oftal'mologicheskii Zhurnal                      | Lower middle income | Europe & Central Asia      | General                                | N/A       | N/A             | 0.19 |
| 119 | Oftal'mologiya                                   | Upper middle income | Europe & Central Asia      | General                                | N/A       | N/A             | 0.13 |
| 120 | Oftal'mologiya. Vostochnaya Evropa               | Upper middle income | Europe & Central Asia      | General                                | N/A       | N/A             | N/A  |
| 121 | Okulistyka                                       | High income         | Europe & Central Asia      | General                                | N/A       | N/A             | N/A  |
| 122 | Oman Journal of Ophthalmology                    | High income         | Middle East & North Africa | General                                | 0.65      | AA              | 0.31 |

|     |                                                         |                     |                            |                                              |            |                 |      |
|-----|---------------------------------------------------------|---------------------|----------------------------|----------------------------------------------|------------|-----------------|------|
| 123 | Open Access Journal of Ophthalmology                    | High income         | North America              | General                                      | N/A        | N/A             | N/A  |
| 124 | Ophthalmic Epidemiology                                 | High income         | Europe & Central Asia      | General                                      | 1.65 (Q4)  | JCR             | 0.73 |
| 125 | Ophthalmic Genetics                                     | High income         | North America              | Basic science                                | 1.8 (Q4)   | JCR             | 0.61 |
| 126 | Ophthalmic Plastic and Reconstructive Surgery           | High income         | North America              | Oculoplastics                                | 1.74 (Q4)  | JCR             | 0.53 |
| 127 | Ophthalmic Research                                     | High income         | Europe & Central Asia      | General                                      | 2.89 (Q2)  | JCR             | 0.89 |
| 128 | Ophthalmic Surgery, Lasers and Imaging Retina           | High income         | North America              | Retina and vitreoretinal surgery             | 1.3 (Q4)   | JCR             | 0.68 |
| 129 | Ophthalmologica                                         | High income         | Europe & Central Asia      | General                                      | 3.25 (Q2)  | JCR             | 1.64 |
| 130 | Ophthalmologische Nachrichten                           | High income         | Europe & Central Asia      | General                                      | N/A        | N/A             | N/A  |
| 131 | Ophthalmology                                           | High income         | North America              | General                                      | 12.07 (Q1) | JCR             | 5.03 |
| 132 | Ophthalmology and Allied Sciences                       | Lower middle income | South Asia                 | General                                      | 3.95       | Journal website | N/A  |
| 133 | Ophthalmology and Therapy                               | High income         | Europe & Central Asia      | General                                      | 3.53 (Q2)  | JCR             | 1.19 |
| 134 | Ophthalmology Glaucoma                                  | High income         | North America              | Glaucoma                                     | 12.08      | Journal website | N/A  |
| 135 | Ophthalmology Journal                                   | High income         | Europe & Central Asia      | General                                      | N/A        | N/A             | N/A  |
| 136 | Ophthalmology Research: An International Journal        | Lower middle income | South Asia                 | General                                      | N/A        | N/A             | N/A  |
| 137 | Ophthalmology Retina                                    | High income         | North America              | Retina and vitreoretinal surgery             | 1.69       | AA              | 1.52 |
| 138 | Ophthalmology Science                                   | High income         | North America              | General                                      | N/A        | N/A             | N/A  |
| 139 | Orbit                                                   | High income         | Europe & Central Asia      | Strabismus and paediatrics;<br>Oculoplastics | 0.88       | AA              | 0.37 |
| 140 | Pakistan Journal of Ophthalmology                       | Lower middle income | South Asia                 | General                                      | N/A        | N/A             | N/A  |
| 141 | Philippine Journal of Ophthalmology                     | Lower middle income | East Asia & Pacific        | General                                      | N/A        | N/A             | N/A  |
| 142 | Progress in Retinal and Eye Research                    | High income         | Europe & Central Asia      | General                                      | 21.19 (Q1) | JCR             | 7.20 |
| 143 | Retina                                                  | High income         | North America              | Retina and vitreoretinal surgery             | 4.25 (Q1)  | JCR             | 2.24 |
| 144 | Retina - Vitreus                                        | Upper middle income | Europe & Central Asia      | Retina and vitreoretinal surgery             | 0.02       | AA              | 0.11 |
| 145 | Retina Today                                            | High income         | North America              | Retina and vitreoretinal surgery             | 0.81       | AA              | 0.11 |
| 146 | Retinal Cases & Brief Reports                           | High income         | North America              | Retina and vitreoretinal surgery             | 0.85       | AA              | 0.43 |
| 147 | Revista Brasileira de Oftalmologia                      | Upper middle income | Latin America & Caribbean  | General                                      | 0.16 (Q4)  | JCR             | 0.14 |
| 148 | Revista Cubana de Oftalmologia                          | Upper middle income | Latin America & Caribbean  | General                                      | N/A        | N/A             | N/A  |
| 149 | Revista Mexicana de Oftalmologia                        | Upper middle income | Latin America & Caribbean  | General                                      | 0.07       | AA              | 0.13 |
| 150 | Revista Oftalmologica Venezolana                        | N/A                 | Latin America & Caribbean  | General                                      | N/A        | N/A             | N/A  |
| 151 | Rossiiskaya Pediatricheskaya Oftal'mologiya             | Upper middle income | Europe & Central Asia      | Strabismus and paediatrics                   | N/A        | N/A             | N/A  |
| 152 | Rossiiskii Oftal'mologicheskii Zhurnal                  | Upper middle income | Europe & Central Asia      | General                                      | N/A        | N/A             | N/A  |
| 153 | Saudi Journal of Ophthalmology                          | High income         | Middle East & North Africa | General                                      | 0.77       | AA              | 0.36 |
| 154 | Seminars in Ophthalmology                               | High income         | Europe & Central Asia      | General                                      | 1.97 (Q3)  | JCR             | 0.74 |
| 155 | Revista de la Sociedad Colombiana de Oftalmologia       | High income         | Europe & Central Asia      | General                                      | N/A        | N/A             | N/A  |
| 156 | Archivos de la Sociedad Espanola de Oftalmologia        | High income         | Europe & Central Asia      | General                                      | 0.46       | AA              | 0.24 |
| 157 | Revista Sociedade Portuguesa de Oftalmologia            | High income         | Europe & Central Asia      | General                                      | N/A        | N/A             | N/A  |
| 158 | Journal de la Societe Marocaine d'Ophthalmologie        | Lower middle income | Middle East & North Africa | General                                      | N/A        | N/A             | N/A  |
| 159 | Spektrum der Augenheilkunde                             | High income         | Europe & Central Asia      | General                                      | 0.07       | AA              | 0.13 |
| 160 | Strabismus                                              | High income         | Europe & Central Asia      | Strabismus and paediatrics                   | N/A        | N/A             | 0.44 |
| 161 | Sudanese Journal of Ophthalmology                       | Low income          | Sub-Saharan Africa         | General                                      | N/A        | N/A             | N/A  |
| 162 | Survey of Ophthalmology                                 | High income         | North America              | General                                      | 6.04 (Q1)  | JCR             | 2.13 |
| 163 | Taiwan Journal of Ophthalmology                         | N/A                 | N/A                        | General                                      | 1.03       | AA              | 0.52 |
| 164 | The Egyptian Journal of Cataract and Refractive Surgery | Lower middle income | Middle East & North Africa | Cataract and refractive surgery              | N/A        | N/A             | N/A  |
| 165 | The Journal of Ophthalmic Photography                   | High income         | North America              | General                                      | N/A        | N/A             | N/A  |
| 166 | The Malaysian Journal of Ophthalmology                  | Upper middle income | East Asia & Pacific        | General                                      | N/A        | N/A             | N/A  |

|     |                                                      |                     |                            |               |           |                 |      |
|-----|------------------------------------------------------|---------------------|----------------------------|---------------|-----------|-----------------|------|
| 167 | The Ocular Surface                                   | High income         | North America              | General       | 5.03 (Q1) | JCR             | N/A  |
| 168 | The Open Ophthalmology Journal                       | High income         | Middle East & North Africa | General       | 1.41      | AA              | N/A  |
| 169 | The Ophthalmology Open Journal                       | Lower middle income | South Asia                 | General       | 0.59      | Journal website | N/A  |
| 170 | The Pan-American Journal of Ophthalmology            | Lower middle income | South Asia                 | General       | 4.10      | AA              | N/A  |
| 171 | Therapeutic Advances in Ophthalmology                | High income         | Europe & Central Asia      | General       | N/A       | N/A             | N/A  |
| 172 | TNOA Journal of Ophthalmic Science and Research      | Lower middle income | South Asia                 | General       | N/A       | N/A             | N/A  |
| 173 | Touch Reviews in Ophthalmology                       | High income         | North America              | General       | 2.11      | AA              | N/A  |
| 174 | Translational Vision Science & Technology            | High income         | North America              | General       | 3.28 (Q2) | JCR             | 1.51 |
| 175 | Tropical Journal of Ophthalmology and Otolaryngology | Lower middle income | South Asia                 | General       | N/A       | N/A             | N/A  |
| 176 | Turkish Journal of Ophthalmology                     | Upper middle income | Europe & Central Asia      | General       | 0.64      | AA              | 0.35 |
| 177 | Turkiye Klinikleri Oftalmoloji Dergisi               | Upper middle income | Europe & Central Asia      | General       | N/A       | N/A             | N/A  |
| 178 | Vestnik Oftal'mologii                                | Upper middle income | Europe & Central Asia      | General       | 0.36      | AA              | 0.17 |
| 179 | Vision Research                                      | High income         | Europe & Central Asia      | General       | 1.88 (Q3) | JCR             | 1.13 |
| 180 | Visual Neuroscience                                  | High income         | Europe & Central Asia      | Basic science | 3.24 (Q2) | JCR             | N/A  |
| 181 | World Journal of Ophthalmology & Vision Research     | High income         | North America              | General       | N/A       | N/A             | N/A  |
| 182 | Yan Kexue                                            | Upper middle income | East Asia & Pacific        | General       | N/A       | N/A             | N/A  |
| 183 | Yanke Xin Jinzhan                                    | Upper middle income | East Asia & Pacific        | General       | N/A       | N/A             | N/A  |
| 184 | Developments in Ophthalmology                        | High income         | Europe & Central Asia      | General       | 0.17      | AA              | 1.11 |
| 185 | Molecular Vision                                     | High income         | North America              | Basic science | 2.36 (Q3) | JCR             | 0.89 |
| 186 | Vision (Switzerland)                                 | High income         | Europe & Central Asia      | General       | 0.57      | AA              | 0.54 |
| 187 | Chinese Journal of Ophthalmology                     | Upper middle income | East Asia & Pacific        | General       | 0.24      | AA              | 0.19 |
| 188 | Chinese Journal of Experimental Ophthalmology        | Upper middle income | East Asia & Pacific        | General       | 0.20      | AA              | 0.12 |
| 189 | Journal of Korean Ophthalmological Society           | High income         | East Asia & Pacific        | General       | 0.12      | AA              | 0.12 |
| 190 | International Eye Science                            | Upper middle income | East Asia & Pacific        | General       | 0.04      | AA              | 0.11 |
| 191 | Folia Japonica de Ophthalmologica Clinica            | High income         | East Asia & Pacific        | General       | 0.02      | AA              | 0.10 |
| 192 | Chinese Journal of Ocular Fundus Diseases            | Upper middle income | East Asia & Pacific        | General       | 0.68      | Journal website | N/A  |
| 193 | Russian Journal of Clinical Ophthalmology            | Upper middle income | Europe & Central Asia      | General       | 0.72      | Journal website | N/A  |

AA, academic accelerator; IF, impact factor; JCR, Journal Citations Reports; N/A, not available.

<sup>a</sup> Categorized based on GNI per capita into low-income (\$1,045 or less), lower middle-income (between \$1,046 and \$4,095), upper middle (between \$4,096 and \$12,695) and high-income (\$12,696 or more) economies

<sup>b</sup> Categorized according to the World Bank's 2021 classification of countries by geographical region

<sup>c</sup> Determined from the journal website by identifying terminology that classifies the journal into subspecialties within ophthalmology

<sup>d</sup> Quartile ranking determined by comparing a journal to others in its Journal Citation Reports category based on impact factor

<sup>e</sup> A measure of journal's impact based on the number of citations received in the three previous years, as indexed by Scopus
